# Supplementary material
Source: publisher figshare collection journal article supplement (https://sage.figshare.com/ndownloader/files/22366179)
Supplement: Supplementary file 1 [file 22366179]

*Table 1. Question stems for mindsets and behaviors survey.*

| Question stem | Response Style | ASCA Standard |
| --- | --- | --- |
| I am able to think carefully about options to make good choices | Likert | B-LS1 |
| I show my teachers that I am creative | Likert | B-LS2 |
| I manage my time very well | Likert | B-LS3 |
| I am very organized | Likert | B-LS3 |
| I have very strong study skills | Likert | B-LS4 |
| I know how to use technology to help me learn | Likert | B-LS5 |
| I have high standards for my work | Likert | B-LS6 |
| I know my goals for school | Likert | B-LS7 |
| I take classes that are challenging for me | Likert | B-LS8 |
| When making a decision, I think about other perspectives | Likert | B-LS9 |
| I do other things after school to make my grades or other talents even better | Likert | B-LS10 |
| I believe I am a balanced person | Likert | M1 |
| I take responsibility for what I do | Likert | B-SMS1 |
| I know how to control my reactions to different things that upset me | Likert | B-SMS2 |
| I know how to do my work on my own | Likert | B-SMS3 |
| I know that when I work hard I will get rewarded | Likert | B-SMS4 |
| I keep working when I am trying to get what I want | Likert | B-SMS5 |
| When school work is hard in one of my classes, I find ways to work it out | Likert | B-SMS6 |
| When I have a challenge to overcome, I know how to get myself through it | Likert | B-SMS7 |
| I stay cool when things keep changing in my life | Likert | B-SMS10 |
| I know how to keep myself safe | Likert | B-SMS9 |
| I am confident in my ability to succeed | Likert | M2 |
| I feel like I belong here at school | Likert | M3 |
| I communicate so that I am easily understood | Likert | B-SS1 |
| I know how to make good relationships with other people | Likert | B-SS2 |
| I know how to create good relationships with adults who can help me succeed | Likert | B-SS3 |
| I know how to show people I understand where they are coming from | Likert | B-SS4 |
| I think about the impact of my choices before I do anything | Likert | B-SS5 |
| I know how to be a leader to get things done | Likert | B-SS7 |
| I know how to speak up for myself when I need to | Likert | B-SS8 |
| I am mature | Likert | B-SS9 |
| I know how to act in different situations | Likert | B-SS9 |
| If I want to be successful then I need to do well in school | Likert | M4 |
| I should use my ability to achieve everything I want | Likert | M5 |
| Learning and work make me feel really good | Likert | M6 |
| I am proud of my school | Likert | School request |
| My teachers care about me | Likert | School request |
| Other teachers, or adults, not on my team support me | Likert | School request |
| My teachers try to make learning fun for me | Likert | School request |
| I feel connected to people at school | Likert | School request |
| My hallway feels safe | Likert | School request |
| I am sure that I will feel supported by my teachers next year | Likert | School request |
| Please write anything you think is good here at your school | Qual – write in |  |
| Please write anything you wish were different here at your school | Qual – write in |  |

*Table 2. Results of mindsets and behaviors survey.*

| **Results of mindsets and behaviors survey** | | | | | | | | |
| --- | --- | --- | --- | --- | --- | --- | --- | --- |
|  | N | | Mean | Median | Mode | Std. Deviation | Minimum | Maximum |
| Valid | Missing |
| I am able to think carefully about options to make good choices | 102 | 0 | 4.206 | 4.000 | 5.0 | .8002 | 2.0 | 5.0 |
| I show my teachers that I am creative | 102 | 0 | 3.725 | 4.000 | 4.0 | .9663 | 1.0 | 5.0 |
| I manage my time very well. | 102 | 0 | 3.441 | 3.000 | 3.0 | .9706 | 1.0 | 5.0 |
| I am very organized | 102 | 0 | 3.441 | 4.000 | 4.0 | 1.1653 | 1.0 | 5.0 |
| I have very strong study skills | 102 | 0 | 3.088 | 3.000 | 3.0 | 1.1267 | 1.0 | 5.0 |
| I know how to use technology to help me learn | 102 | 0 | 4.078 | 4.000 | 5.0 | 1.0962 | 1.0 | 5.0 |
| I have high standards for my work. | 102 | 0 | 3.951 | 4.000 | 4.0 | .8370 | 1.0 | 5.0 |
| I know my goals for school. | 102 | 0 | 4.422 | 5.000 | 5.0 | .8837 | 1.0 | 5.0 |
| I take classes that are a challenge for me. | 102 | 0 | 3.500 | 4.000 | 4.0 | 1.0877 | 1.0 | 5.0 |
| When making a decision, I think about other perspectives. | 102 | 0 | 3.588 | 4.000 | 4.0 | 1.1376 | 1.0 | 5.0 |
| I do other things after school to make my grades or other talents even better. | 102 | 0 | 3.108 | 3.000 | 3.0 | 1.4065 | 1.0 | 5.0 |
| I believe I am a balanced person | 102 | 0 | 3.647 | 4.000 | 3.0 | .9507 | 1.0 | 5.0 |
| I take responsibility for what I do | 102 | 0 | 4.137 | 4.000 | 5.0 | .9651 | 1.0 | 5.0 |
| I know how to control my reactions to different things that upset me | 102 | 0 | 3.676 | 4.000 | 4.0 | 1.1532 | 1.0 | 5.0 |
| I know how to do my work on my own | 102 | 0 | 4.147 | 4.000 | 5.0 | .9481 | 1.0 | 5.0 |
| I know that when I work hard I will get rewarded | 102 | 0 | 4.059 | 4.000 | 5.0 | .9526 | 1.0 | 5.0 |
| I keep working when I am trying to get what I want. | 102 | 0 | 4.118 | 4.000 | 5.0 | .9471 | 1.0 | 5.0 |
| When school work is hard in one of my classes, I find ways to work it out | 102 | 0 | 3.775 | 4.000 | 4.0 | 1.0040 | 1.0 | 5.0 |
| When I have a challenge to overcome, I know how to get myself through it | 102 | 0 | 3.745 | 4.000 | 4.0 | 1.0117 | 1.0 | 5.0 |
| I stay cool when things keep changing in my life. | 102 | 0 | 3.706 | 4.000 | 4.0 | 1.0492 | 1.0 | 5.0 |
| I know how to keep myself safe. | 102 | 0 | 4.480 | 5.000 | 5.0 | .7138 | 1.0 | 5.0 |
| I am confident in my ability to succeed | 102 | 0 | 4.431 | 5.000 | 5.0 | .7644 | 2.0 | 5.0 |
| I feel like I belong here at school. | 102 | 0 | 3.392 | 4.000 | 4.0 | 1.2361 | 1.0 | 5.0 |
| I communicate so that I am easily understood | 102 | 0 | 3.686 | 4.000 | 3.0 | 1.0243 | 1.0 | 5.0 |
| I know how to make good relationships with other people | 102 | 0 | 3.784 | 4.000 | 4.0 | 1.0775 | 1.0 | 5.0 |
| I know how to create good relationships with adults who can help me succeed. | 102 | 0 | 4.059 | 4.000 | 4.0 | .9316 | 1.0 | 5.0 |
| I know how to show people I understand where they are coming from | 102 | 0 | 4.049 | 4.000 | 4.0 | .8830 | 2.0 | 5.0 |
| I think about the impact of my choices before I do anything | 102 | 0 | 3.863 | 4.000 | 4.0 | .9854 | 1.0 | 5.0 |
| I know how to be a leader to get things done. | 102 | 0 | 4.010 | 4.000 | 4.0 | .9065 | 2.0 | 5.0 |
| I know how to speak up for myself when I need to | 102 | 0 | 4.255 | 5.000 | 5.0 | 1.0501 | 1.0 | 5.0 |
| I am mature | 102 | 0 | 4.255 | 4.000 | 5.0 | .8167 | 2.0 | 5.0 |
| I know how to act in different situations. | 102 | 0 | 4.265 | 4.000 | 4.0 | .7165 | 2.0 | 5.0 |
| If I want to be successful then I need to do well in school | 102 | 0 | 4.775 | 5.000 | 5.0 | .4856 | 3.0 | 5.0 |
| I should use my ability to achieve everything I want | 102 | 0 | 4.382 | 5.000 | 5.0 | .7584 | 2.0 | 5.0 |
| Learning and work make me feel really good. | 102 | 0 | 3.745 | 4.000 | 4.0 | 1.0018 | 1.0 | 5.0 |
| I am proud of my school | 102 | 0 | 2.784 | 3.000 | 3.0 | 1.2156 | 1.0 | 5.0 |
| My teachers care about me | 102 | 0 | 3.931 | 4.000 | 4.0a | 1.0075 | 1.0 | 5.0 |
| Other teachers or adults, not on my team, support me | 102 | 0 | 3.500 | 4.000 | 4.0 | 1.1497 | 1.0 | 5.0 |
| My teachers try to make learning fun for me | 102 | 0 | 3.745 | 4.000 | 4.0 | 1.0962 | 1.0 | 5.0 |
| I feel connected to people at school | 102 | 0 | 3.206 | 3.000 | 3.0 | 1.0748 | 1.0 | 5.0 |
| My hallway feels safe | 102 | 0 | 2.980 | 3.000 | 3.0 | 1.1856 | 1.0 | 5.0 |
| My school feels safe | 102 | 0 | 2.775 | 3.000 | 3.0 | 1.2015 | 1.0 | 5.0 |
| I am sure that I will feel supported by my teachers next year. | 102 | 0 | 3.833 | 4.000 | 4.0 | .8909 | 2.0 | 5.0 |
| a. Multiple modes exist. The smallest value is shown | | | | | | | | |

*Table 3. Sample responses to question, “Write one thing you wish were different about your school”*

| *“Students, classrooms, learning environment”* |
| --- |
| *“I wish this school has good opportunities and good learning stuff that will help you to do better and learn better. And also, if any student does better in class, they should call the parent”* |
| *“The hallways could be safer; the classes could be more challenging, the teacher could have more control over their class”* |
| *“More security, better teachers, better classroom placement”* |
| *“I wish that there were classes that could actually help us to get into college”* |
| *“The classes could be more challenging and they would push kids to do better”* |
| *“I wish the students were more serious with their work in class”* |
| *“I wish they would be more strict toward academics”* |
| *“We need more challenging work!”* |
| *“We need to be able to use computers and not have stuff that is broken”* |
